# Supplementary material for: Unravelling the Function of the Sesquiterpene Cyclase STC3 in the Lifecycle of Botrytis cinerea
Source: Int J Mol Sci. 2024 May 8;25(10):5125. doi: 10.3390/ijms25105125 (PMC11120764; doi:10.3390/ijms25105125)
Supplement: Supplementary file 1 [file ijms-25-05125-s001.zip › Supporting information Table S2.xlsx]

## Sheet: Hoja1
Accession	Description	Scientific Name	Max Score	Total Score	Query Cover	E value	Per. Ident	Acc. Len
PQE05643.1	sesquiterpene cyclase protein [Rutstroemia sp. NJR-2017a BBW]	Rutstroemia sp. NJR-2017a BBW	649	649	0.99	0.0	72.41%	428
KAI9816264.1	hypothetical protein M1827_001865 [Pycnora praestabilis]	Pycnora praestabilis	462	462	0.92	7e-158	55.05%	435
KAI4182135.1	hypothetical protein LQ348_004898 [Seirophora lacunosa]	Seirophora lacunosa	420	420	0.93	1e-141	54.04%	405
KAI4287518.1	hypothetical protein L6R35_003227 [Caloplaca aegaea]	Caloplaca aegaea	411	411	0.94	6e-138	50.63%	417
MCJ1446520.1	hypothetical protein [Stictis urceolata]	Stictis urceolata	405	405	0.95	1e-134	50.13%	479
KAI4112432.1	hypothetical protein LQ345_006420 [Seirophora villosa]	Seirophora villosa	390	390	0.82	2e-130	56.76%	366
KAI4264760.1	hypothetical protein L6R38_009766 [Xanthoria sp. 2 TBL-2021]	Xanthoria sp. 2 TBL-2021	385	385	0.96	8e-128	48.15%	418
KAI4136331.1	hypothetical protein LQ341_005677 [Variospora aurantia]	Variospora aurantia	378	378	0.92	2e-125	50.00%	386
KAI4200162.1	hypothetical protein LQ350_004123 [Niorma chrysophthalma]	Niorma chrysophthalma	358	358	0.92	5e-117	49.22%	428
KAI4249403.1	hypothetical protein LQ352_005658 [Teloschistes flavicans]	Teloschistes flavicans	337	337	0.9	6e-109	46.95%	414
RVX66215.1	hypothetical protein B0A52_10142 [Exophiala mesophila]	Exophiala mesophila	327	327	0.91	2e-104	42.68%	463
KAI4104956.1	hypothetical protein L6R37_003000 [Teloschistes peruensis]	Teloschistes peruensis	310	310	0.94	2e-98	44.02%	392
KAI9735008.1	hypothetical protein M1834_002091 [Cirrosporium novae-zelandiae]	Cirrosporium novae-zelandiae	293	293	0.98	6e-92	39.31%	406
XP_013259848.1	uncharacterized protein A1O9_05175 [Exophiala aquamarina CBS 119918]	Exophiala aquamarina CBS 119918	291	291	0.91	2e-91	39.95%	390
KAG9195858.1	hypothetical protein G6011_00979 [Alternaria panax]	Alternaria panax	280	280	0.93	2e-86	39.36%	422
RMZ67712.1	sesquiterpene cyclase [Pyrenophora seminiperda CCB06]	Pyrenophora seminiperda CCB06	271	271	0.94	7e-83	38.35%	417
XP_043164498.1	uncharacterized protein ALTATR162_LOCUS968 [Alternaria atra]	Alternaria atra	268	268	0.93	6e-82	38.46%	422
KAJ6133775.1	terpenoid synthase [Penicillium sp. IBT 18751x]	Penicillium sp. IBT 18751x	267	267	0.91	9e-82	37.08%	405
EOD45492.1	putative sesquiterpene cyclase protein [Neofusicoccum parvum UCRNP2]	Neofusicoccum parvum UCRNP2	266	266	0.94	2e-81	36.39%	401
XP_056580837.1	terpenoid synthase [Penicillium concentricum]	Penicillium concentricum	266	266	0.93	3e-81	36.60%	405
KAI1247300.1	hypothetical protein MGN70_011188 [Eutypa lata]	Eutypa lata	266	266	0.94	4e-81	37.75%	421
6LCC_A	Chain A, AaTPS [Alternaria alternata]	Alternaria alternata	266	266	0.94	5e-81	38.60%	430
GME25115.1	putative sesquiterpene cyclase protein [Neofusicoccum parvum]	Neofusicoccum parvum	264	264	0.94	1e-80	36.13%	401
KAF4301027.1	putative sesquiterpene cyclase protein [Botryosphaeria dothidea]	Botryosphaeria dothidea	264	264	0.94	2e-80	36.22%	400
EMR64669.1	putative sesquiterpene cyclase protein [Eutypa lata UCREL1]	Eutypa lata UCREL1	264	264	0.93	2e-80	38.21%	417
XP_052986662.1	terpenoid synthase [Diaporthe amygdali]	Diaporthe amygdali	263	263	0.84	4e-80	40.92%	414
XP_007291028.1	putative Aristolochene synthase [Drepanopeziza brunnea f. sp. 'multigermtubi' MB_m1]	Drepanopeziza brunnea f. sp. 'multigermtubi' MB_m1	264	264	0.94	5e-80	37.05%	432
KAK2606538.1	hypothetical protein N8I77_005280 [Diaporthe amygdali]	Diaporthe amygdali	262	262	0.84	7e-80	40.92%	403
XP_056526264.1	terpenoid synthase [Penicillium bovifimosum]	Penicillium bovifimosum	255	255	0.91	3e-77	35.77%	405
XP_033521855.1	terpenoid synthase [Dothidotthia symphoricarpi CBS 119687]	Dothidotthia symphoricarpi CBS 119687	255	255	0.93	5e-77	36.39%	410
CZT13487.1	uncharacterized protein RAG0_16989 [Rhynchosporium agropyri]	Rhynchosporium agropyri	254	254	0.94	6e-77	35.53%	398
CZT50980.1	uncharacterized protein RSE6_12058 [Rhynchosporium secalis]	Rhynchosporium secalis	253	253	0.94	2e-76	35.28%	398
XP_060379205.1	uncharacterized protein CTAM01_10054 [Colletotrichum tamarilloi]	Colletotrichum tamarilloi	253	253	0.94	2e-76	36.62%	410
CZT05011.1	uncharacterized protein RCO7_09144 [Rhynchosporium commune]	Rhynchosporium commune	253	253	0.94	3e-76	35.28%	398
KAK1449430.1	hypothetical protein CMEL01_08745 [Colletotrichum melonis]	Colletotrichum melonis	253	253	0.94	3e-76	37.12%	410
KAJ1323763.1	terpene synthase family 2 [Microdochium nivale]	Microdochium nivale	252	252	0.94	5e-76	34.77%	400
KAI3529159.1	hypothetical protein CSPX01_15713 [Colletotrichum filicis]	Colletotrichum filicis	253	253	0.94	6e-76	36.91%	410
KAH7055906.1	isoprenoid synthase domain-containing protein [Macrophomina phaseolina]	Macrophomina phaseolina	251	251	0.94	9e-76	36.22%	397
XP_060403333.1	uncharacterized protein CABS01_07084 [Colletotrichum abscissum]	Colletotrichum abscissum	251	251	0.94	2e-75	36.87%	410
XP_060355656.1	uncharacterized protein CPAR01_00508 [Colletotrichum paranaense]	Colletotrichum paranaense	251	251	0.94	2e-75	36.87%	410
XP_035333720.1	uncharacterized protein HER10_EVM0001386 [Colletotrichum scovillei]	Colletotrichum scovillei	250	250	0.94	3e-75	36.87%	410
XP_053052277.1	uncharacterized protein COL516b_003342 [Colletotrichum fioriniae]	Colletotrichum fioriniae	250	250	0.93	5e-75	37.24%	410
XP_060308242.1	uncharacterized protein CCOS01_12893 [Colletotrichum costaricense]	Colletotrichum costaricense	250	250	0.94	5e-75	36.62%	410
KAJ0326840.1	hypothetical protein COL5a_006388 [Colletotrichum fioriniae]	Colletotrichum fioriniae	250	250	0.93	5e-75	37.24%	404
KDR73888.1	hypothetical protein GALMADRAFT_141658 [Galerina marginata CBS 339.88]	Galerina marginata CBS 339.88	249	249	0.95	6e-75	34.00%	403
EXF84938.1	hypothetical protein CFIO01_02151 [Colletotrichum fioriniae PJ7]	Colletotrichum fioriniae PJ7	249	249	0.93	8e-75	37.24%	410
KAH8774768.1	isoprenoid synthase domain-containing protein [Diaporthaceae sp. PMI_573]	Diaporthaceae sp. PMI_573	248	248	0.79	1e-74	40.73%	364
KXH47766.1	hypothetical protein CSIM01_11716 [Colletotrichum simmondsii]	Colletotrichum simmondsii	248	248	0.94	3e-74	36.62%	410
KAK1713912.1	isoprenoid synthase domain-containing protein [Colletotrichum lupini]	Colletotrichum lupini	244	244	0.81	1e-73	38.87%	341
KXH48519.1	hypothetical protein CNYM01_11033 [Colletotrichum nymphaeae SA-01]	Colletotrichum nymphaeae SA-01	246	246	0.82	1e-73	39.41%	394
XP_058357881.1	uncharacterized protein ONS95_013498 [Cadophora gregata]	Cadophora gregata	246	246	0.9	2e-73	35.54%	395
XP_060425635.1	isoprenoid synthase domain-containing protein [Colletotrichum godetiae]	Colletotrichum godetiae	243	243	0.81	3e-73	38.58%	341
KAI9047118.1	hypothetical protein LZ554_009191 [Drepanopeziza brunnea f. sp. 'monogermtubi']	Drepanopeziza brunnea f. sp. 'monogermtubi'	244	244	0.8	5e-73	40.63%	397
XP_035366814.1	Sesquiterpene cyclase protein [Lasiodiplodia theobromae]	Lasiodiplodia theobromae	241	241	0.94	2e-71	35.43%	406
XP_060360513.1	isoprenoid synthase domain-containing protein [Colletotrichum acutatum]	Colletotrichum acutatum	238	238	0.8	3e-71	38.97%	334
KAF9636669.1	putative sesquiterpene cyclase protein [Lasiodiplodia theobromae]	Lasiodiplodia theobromae	239	239	0.94	7e-71	35.34%	407
KAJ5026092.1	isoprenoid synthase domain-containing protein [Bipolaris maydis]	Bipolaris maydis	239	239	0.95	8e-71	32.61%	420
OCK98393.1	hypothetical protein K441DRAFT_629429 [Cenococcum geophilum 1.58]	Cenococcum geophilum 1.58	239	239	0.91	1e-70	35.77%	410
GME56710.1	Terpenoid synthase [Neofusicoccum parvum]	Neofusicoccum parvum	238	238	0.93	1e-70	35.40%	400
KAF4303597.1	Terpenoid synthase [Botryosphaeria dothidea]	Botryosphaeria dothidea	237	237	0.82	4e-70	36.66%	404
KAK1491383.1	hypothetical protein CCUS01_03168 [Colletotrichum cuscutae]	Colletotrichum cuscutae	237	237	0.94	4e-70	35.86%	405
OQE00061.1	hypothetical protein PENVUL_c059G00865 [Penicillium vulpinum]	Penicillium vulpinum	237	237	0.93	4e-70	35.19%	411
KAH7558906.1	hypothetical protein BM1_05043 [Bipolaris maydis]	Bipolaris maydis	238	238	0.95	4e-70	33.01%	421
XP_014078695.1	uncharacterized protein COCC4DRAFT_170236 [Bipolaris maydis ATCC 48331]	Bipolaris maydis ATCC 48331	237	237	0.95	6e-70	34.30%	415
KAB2570956.1	hypothetical protein DBV05_g10389 [Lasiodiplodia theobromae]	Lasiodiplodia theobromae	236	236	0.94	1e-69	34.92%	406
XP_022482806.1	hypothetical protein PENARI_c048G08844 [Penicillium arizonense]	Penicillium arizonense	236	236	0.94	2e-69	34.35%	433
XP_047752266.1	Terpene cyclase aneC [Psilocybe cubensis]	Psilocybe cubensis	236	236	0.94	2e-69	32.76%	420
KAJ5056629.1	isoprenoid synthase domain-containing protein [Bipolaris maydis]	Bipolaris maydis	235	235	0.95	3e-69	32.93%	408
XP_060440226.1	isoprenoid synthase domain-containing protein [Colletotrichum phormii]	Colletotrichum phormii	233	233	0.81	5e-69	37.39%	341
PLN75338.1	isoprenoid synthase domain-containing protein [Aspergillus taichungensis]	Aspergillus taichungensis	234	234	0.91	8e-69	35.92%	401
KAF3396683.1	hypothetical protein DPV78_008181 [Talaromyces pinophilus]	Talaromyces pinophilus	233	233	0.94	2e-68	34.91%	419
KAK0622157.1	hypothetical protein DIS24_g11344 [Lasiodiplodia hormozganensis]	Lasiodiplodia hormozganensis	231	231	0.94	7e-68	34.84%	407
PCG88632.1	hypothetical protein PENOC_110150 [Penicillium occitanis (nom. inval.)]	Penicillium occitanis (nom. inval.)	232	232	0.94	2e-67	34.91%	454
KAK2594899.1	hypothetical protein QQS21_007398 [Conoideocrella luteorostrata]	Conoideocrella luteorostrata	230	230	0.96	3e-67	32.85%	410
KAJ5473726.1	hypothetical protein N7475_003292 [Penicillium sp. IBT 31633x]	Penicillium sp. IBT 31633x	226	226	0.82	2e-66	36.47%	369
KAH7051358.1	isoprenoid synthase domain-containing protein [Macrophomina phaseolina]	Macrophomina phaseolina	226	226	0.83	6e-66	34.49%	404
EKG15849.1	Terpenoid synthase [Macrophomina phaseolina MS6]	Macrophomina phaseolina MS6	226	226	0.83	9e-66	34.49%	404
KKY13106.1	putative sesquiterpene cyclase [Diplodia seriata]	Diplodia seriata	226	226	0.91	9e-66	34.28%	404
XP_057110417.1	uncharacterized protein N7479_003395 [Penicillium vulpinum]	Penicillium vulpinum	223	223	0.81	5e-65	36.61%	356
XP_040686997.1	uncharacterized protein ASPWEDRAFT_30406 [Aspergillus wentii DTO 134E9]	Aspergillus wentii DTO 134E9	224	224	0.9	8e-65	33.16%	414
KAJ5986379.1	hypothetical protein N7451_010744 [Penicillium sp. IBT 35674x]	Penicillium sp. IBT 35674x	222	222	0.95	3e-64	33.83%	412
OMP84293.1	hypothetical protein BK809_0000300 [Diplodia seriata]	Diplodia seriata	219	219	0.81	5e-64	36.39%	335
KAI9933568.1	hypothetical protein MW887_008041 [Aspergillus wentii]	Aspergillus wentii	221	221	0.9	6e-64	32.90%	414
XP_020126298.1	sesquiterpene cyclase protein [Diplodia corticola]	Diplodia corticola	221	221	0.91	8e-64	32.40%	408
KAH7551419.1	hypothetical protein BM1_09735 [Bipolaris maydis]	Bipolaris maydis	220	220	0.91	9e-64	33.77%	391
XP_056822724.1	uncharacterized protein N7477_004280 [Penicillium maclennaniae]	Penicillium maclennaniae	219	219	0.91	1e-63	33.94%	375
RDA92444.1	hypothetical protein CP533_6459 [Ophiocordyceps camponoti-saundersi (nom. inval.)]	Ophiocordyceps camponoti-saundersi (nom. inval.)	221	221	0.96	2e-63	32.93%	424
PPQ89747.1	LOW QUALITY PROTEIN: hypothetical protein CVT25_014192 [Psilocybe cyanescens]	Psilocybe cyanescens	221	221	0.91	2e-63	32.26%	430
CRG87145.1	hypothetical protein PISL3812_04160 [Talaromyces islandicus]	Talaromyces islandicus	219	219	0.91	3e-63	32.65%	409
KAJ3940666.1	hypothetical protein N0V96_009678 [Colletotrichum fioriniae]	Colletotrichum fioriniae	218	218	0.93	4e-63	35.20%	387
KAJ5029654.1	isoprenoid synthase domain-containing protein [Bipolaris maydis]	Bipolaris maydis	218	218	0.91	1e-62	33.51%	389
XP_047752268.1	Terpene cyclase aneC [Psilocybe cubensis]	Psilocybe cubensis	216	216	0.82	2e-62	34.93%	354
KAJ6050909.1	hypothetical protein N7460_001443 [Penicillium canescens]	Penicillium canescens	216	216	0.84	2e-62	35.23%	356
XP_014078235.1	uncharacterized protein COCC4DRAFT_140244 [Bipolaris maydis ATCC 48331]	Bipolaris maydis ATCC 48331	216	216	0.91	2e-62	33.77%	386
KAF2228525.1	hypothetical protein EV356DRAFT_562544 [Viridothelium virens]	Viridothelium virens	216	216	0.96	6e-62	33.25%	408
KJY00868.1	hypothetical protein TI39_contig309g00009 [Zymoseptoria brevis]	Zymoseptoria brevis	218	218	0.95	7e-62	30.86%	467
SMQ47695.1	unnamed protein product [Zymoseptoria tritici ST99CH_3D7]	Zymoseptoria tritici ST99CH_3D7	217	217	0.94	9e-62	30.66%	464
PFH57673.1	hypothetical protein XA68_14701 [Ophiocordyceps unilateralis]	Ophiocordyceps unilateralis	215	215	0.94	1e-61	33.58%	414
GME27018.1	Terpenoid synthase [Neofusicoccum parvum]	Neofusicoccum parvum	215	215	0.86	1e-61	34.82%	400
SMR47478.1	unnamed protein product [Zymoseptoria tritici ST99CH_3D1]	Zymoseptoria tritici ST99CH_3D1	217	217	0.94	2e-61	30.66%	478
SMR46228.1	unnamed protein product [Zymoseptoria tritici ST99CH_1E4]	Zymoseptoria tritici ST99CH_1E4	217	217	0.94	2e-61	30.66%	478
KAE8153365.1	isoprenoid synthase domain-containing protein [Aspergillus avenaceus]	Aspergillus avenaceus	216	216	0.99	3e-61	33.80%	451
XP_007682191.1	uncharacterized protein COCMIDRAFT_79881 [Bipolaris oryzae ATCC 44560]	Bipolaris oryzae ATCC 44560	213	213	0.91	4e-61	33.42%	384
KAH7065118.1	isoprenoid synthase domain-containing protein [Macrophomina phaseolina]	Macrophomina phaseolina	214	214	0.8	4e-61	35.93%	418
XP_058312202.1	uncharacterized protein N7498_002796 [Penicillium cinerascens]	Penicillium cinerascens	211	211	0.81	8e-61	36.98%	352
KAJ5503279.1	hypothetical protein N7463_006153 [Penicillium fimorum]	Penicillium fimorum	210	210	0.73	1e-60	36.07%	319
KAI0126219.1	isoprenoid synthase domain-containing protein [Xylariales sp. AK1849]	Xylariales sp. AK1849	211	211	0.93	3e-60	33.59%	409
XP_047752265.1	Terpene cyclase aneC [Psilocybe cubensis]	Psilocybe cubensis	211	211	0.82	4e-60	33.43%	393
KFY93583.1	hypothetical protein V500_03648 [Pseudogymnoascus sp. VKM F-4518 (FW-2643)]	Pseudogymnoascus sp. VKM F-4518 (FW-2643)	208	208	0.81	2e-59	34.41%	354
KOS18748.1	Fusicoccadiene synthase [Escovopsis weberi]	Escovopsis weberi	209	209	0.94	4e-59	33.25%	404
KAJ5172263.1	hypothetical protein N7492_004856 [Penicillium capsulatum]	Penicillium capsulatum	209	209	0.91	4e-59	32.99%	414
XP_047752267.1	Fusicoccadiene synthase [Psilocybe cubensis]	Psilocybe cubensis	208	208	0.95	1e-58	31.31%	427
XP_024675625.1	isoprenoid synthase domain-containing protein [Aspergillus candidus]	Aspergillus candidus	205	205	0.81	2e-58	34.99%	351
EMD97213.1	hypothetical protein COCHEDRAFT_1163834 [Bipolaris maydis C5]	Bipolaris maydis C5	205	205	0.91	5e-58	33.25%	375
KAF3020906.1	hypothetical protein E8E14_000457 [Neopestalotiopsis sp. 37M]	Neopestalotiopsis sp. 37M	204	204	0.91	2e-57	32.23%	410
TQV94468.1	Aristolochene synthase [Cordyceps javanica]	Cordyceps javanica	205	205	0.9	2e-57	31.65%	451
KAJ6050227.1	hypothetical protein N7444_006943 [Penicillium canescens]	Penicillium canescens	203	203	0.91	3e-57	33.50%	382
XP_028484829.1	isoprenoid synthase domain-containing protein [Paecilomyces variotii]	Paecilomyces variotii	203	203	0.91	3e-57	33.51%	391
RDA87821.1	hypothetical protein CP532_2963 [Ophiocordyceps camponoti-leonardi (nom. inval.)]	Ophiocordyceps camponoti-leonardi (nom. inval.)	204	204	0.93	4e-57	32.33%	409
KAJ2977071.1	hypothetical protein NQ176_g4579 [Lecanicillium fungicola]	Lecanicillium fungicola	203	203	0.94	5e-57	32.58%	405
XP_007707330.1	uncharacterized protein COCCADRAFT_32559 [Bipolaris zeicola 26-R-13]	Bipolaris zeicola 26-R-13	201	201	0.95	2e-56	31.57%	392
KAJ9400810.1	hypothetical protein DTO282F9_2378 [Paecilomyces variotii]	Paecilomyces variotii	201	201	0.91	2e-56	32.99%	391
XP_003855522.1	uncharacterized protein MYCGRDRAFT_36941 [Zymoseptoria tritici IPO323]	Zymoseptoria tritici IPO323	197	197	0.79	1e-55	33.44%	314
PYI04101.1	hypothetical protein BO78DRAFT_321184 [Aspergillus sclerotiicarbonarius CBS 121057]	Aspergillus sclerotiicarbonarius CBS 121057	197	197	0.81	1e-55	33.53%	334
KAE8318571.1	isoprenoid synthase domain-containing protein [Aspergillus transmontanensis]	Aspergillus transmontanensis	200	200	0.91	3e-55	31.11%	452
KAJ9203665.1	hypothetical protein DTO032I3_3015 [Paecilomyces variotii]	Paecilomyces variotii	198	198	0.91	3e-55	32.81%	391
PIG79308.1	hypothetical protein AARAC_004253 [Aspergillus arachidicola]	Aspergillus arachidicola	200	200	0.91	3e-55	31.04%	454
KAJ9405254.1	hypothetical protein DTO045G8_7011 [Paecilomyces variotii]	Paecilomyces variotii	198	198	0.91	3e-55	32.73%	391
XP_040693283.1	uncharacterized protein ASPWEDRAFT_66415 [Aspergillus wentii DTO 134E9]	Aspergillus wentii DTO 134E9	198	198	0.91	4e-55	31.36%	403
KAJ9301929.1	hypothetical protein DTO271G3_795 [Paecilomyces variotii]	Paecilomyces variotii	197	197	0.91	6e-55	32.38%	391
RAQ46419.1	hypothetical protein AFGD_000179 [Aspergillus flavus]	Aspergillus flavus	197	197	0.91	5e-54	30.26%	452
KAJ9292305.1	hypothetical protein DTO021C3_198 [Paecilomyces variotii]	Paecilomyces variotii	195	195	0.91	5e-54	32.56%	391
RMZ47027.1	hypothetical protein CA14_002123 [Aspergillus flavus]	Aspergillus flavus	197	197	0.91	5e-54	30.26%	452
RAQ74924.1	hypothetical protein COH21_006270 [Aspergillus flavus]	Aspergillus flavus	196	196	0.91	5e-54	30.26%	452
QRD90029.1	isoprenoid synthase domain-containing protein [Aspergillus flavus]	Aspergillus flavus	196	196	0.91	5e-54	30.26%	452
KOC13352.1	hypothetical protein AFLA70_89g003291 [Aspergillus flavus AF70]	Aspergillus flavus AF70	196	196	0.91	6e-54	30.26%	452
KAE8167292.1	isoprenoid synthase domain-containing protein [Aspergillus tamarii]	Aspergillus tamarii	196	196	0.91	8e-54	31.01%	448
KAB8217191.1	isoprenoid synthase domain-containing protein [Aspergillus novoparasiticus]	Aspergillus novoparasiticus	192	192	0.79	2e-53	33.94%	343
XP_058371460.1	uncharacterized protein N7446_005534 [Penicillium canescens]	Penicillium canescens	193	193	0.91	3e-53	32.49%	392
EKG12262.1	Cytochrome b5 [Macrophomina phaseolina MS6]	Macrophomina phaseolina MS6	192	192	0.94	5e-53	31.97%	370
KAJ9262081.1	hypothetical protein DTO195F2_3783 [Paecilomyces variotii]	Paecilomyces variotii	191	191	0.91	1e-52	32.29%	391
KAE8324533.1	isoprenoid synthase domain-containing protein [Aspergillus sergii]	Aspergillus sergii	184	184	0.79	4e-50	33.23%	368
KAJ6009039.1	hypothetical protein N7522_004055 [Penicillium canescens]	Penicillium canescens	184	184	0.79	7e-50	32.60%	376
KAE8339545.1	hypothetical protein BDV24DRAFT_152703 [Aspergillus arachidicola]	Aspergillus arachidicola	182	182	0.79	1e-49	32.33%	366
XP_024691018.1	terpenoid synthase [Aspergillus campestris IBT 28561]	Aspergillus campestris IBT 28561	184	184	0.92	2e-49	30.67%	425
XP_023091495.1	unnamed protein product [Aspergillus oryzae RIB40]	Aspergillus oryzae RIB40	182	182	0.79	4e-49	31.72%	376
KAJ1717558.1	isoprenoid synthase domain-containing protein [Aspergillus flavus]	Aspergillus flavus	181	181	0.79	5e-49	31.72%	368
EIT78885.1	hypothetical protein Ao3042_04835 [Aspergillus oryzae 3.042]	Aspergillus oryzae 3.042	181	181	0.79	5e-49	31.72%	376
KFY94603.1	hypothetical protein V500_03145 [Pseudogymnoascus sp. VKM F-4518 (FW-2643)]	Pseudogymnoascus sp. VKM F-4518 (FW-2643)	178	178	0.81	3e-48	32.84%	343
XP_031927095.1	isoprenoid synthase domain-containing protein [Aspergillus caelatus]	Aspergillus caelatus	178	178	0.79	8e-48	32.12%	366
KAB8209620.1	isoprenoid synthase domain-containing protein [Aspergillus parasiticus]	Aspergillus parasiticus	176	176	0.79	2e-47	32.12%	334
KAE8419877.1	isoprenoid synthase domain-containing protein [Aspergillus pseudocaelatus]	Aspergillus pseudocaelatus	177	177	0.79	4e-47	31.82%	390
XP_033406369.1	uncharacterized protein GIQ15_05222 [Arthroderma uncinatum]	Arthroderma uncinatum	173	173	0.92	2e-45	32.00%	434
KAJ4414003.1	hypothetical protein N0V82_008173 [Gnomoniopsis sp. IMI 355080]	Gnomoniopsis sp. IMI 355080	172	172	0.92	4e-45	31.74%	400
XP_047752269.1	Terpene cyclase aneC [Psilocybe cubensis]	Psilocybe cubensis	170	170	0.71	7e-45	33.12%	353
OOO11386.1	hypothetical protein OAory_01078560 [Aspergillus oryzae]	Aspergillus oryzae	171	171	0.84	9e-45	30.20%	388
KFZ14995.1	hypothetical protein V502_05825 [Pseudogymnoascus sp. VKM F-4520 (FW-2644)]	Pseudogymnoascus sp. VKM F-4520 (FW-2644)	166	166	0.81	1e-43	30.77%	323
KAE8307935.1	isoprenoid synthase domain-containing protein [Aspergillus transmontanensis]	Aspergillus transmontanensis	159	159	0.79	4e-41	30.42%	327
XP_058378768.1	terpenoid synthase [Penicillium canescens]	Penicillium canescens	125	125	0.74	4e-28	30.06%	359
